# Supplementary material for: Cd(II) Sorption on Montmorillonite-Humic acid-Bacteria Composites
Source: PubMed Central journal article supplement (PMC4726142; doi:10.1038/srep19499), 2016-01-21
Supplement: srep19499-s1.pdf [file srep19499-s1.pdf]

## **Supplementary Information**

### **Cd(II) Sorption on Montmorillonite-Humic acid-Bacteria Composites**

**Huihui Du<sup>1,2</sup>, Wenli Chen<sup>1,\*</sup>, Peng Cai<sup>1,2</sup>, Xingmin Rong<sup>1,2</sup>, Ke Dai<sup>1,2</sup>, Caroline L.**

**Peacock<sup>3</sup>, Qiaoyun Huang<sup>1,2,\*</sup>**

<sup>1</sup>State Key Laboratory of Agricultural Microbiology, Huazhong Agricultural University,  
Wuhan 430070, China

<sup>2</sup>Key Laboratory of Arable Land Conservation (Middle and Lower Reaches of Yangtze River),  
Ministry of Agriculture, College of Resources and Environment, Huazhong Agricultural  
University, Wuhan 430070, China

<sup>3</sup>University of Leeds, School of Earth and Environment, LS2 9JT, UK

\*Corresponding Author: phone: +86 27 87671033; fax: +86 27 87280670; email:

[wlchen@mail.hzau.edu.cn](mailto:wlchen@mail.hzau.edu.cn); [qyhuang@mail.hzau.edu.cn](mailto:qyhuang@mail.hzau.edu.cn)

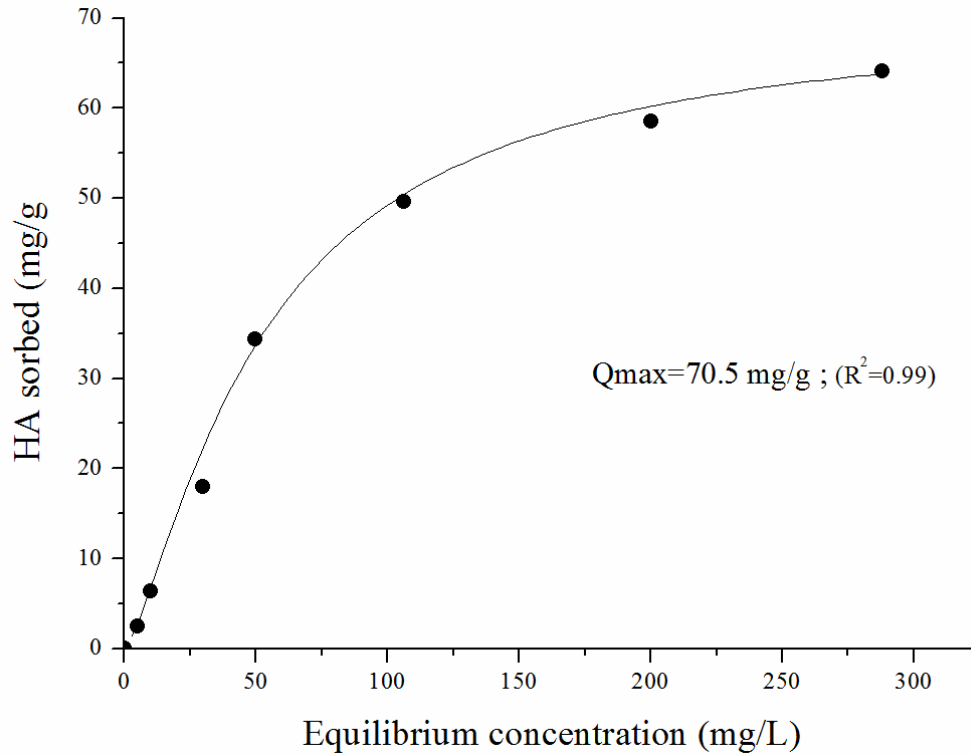

**Figure S1.** Equilibrium adsorption of humic acid on montmorillonite in the presence of 0.01 mol L<sup>-1</sup> KNO<sub>3</sub> at pH 5 and 28 °C.

### ITC data analysis

The ITC data analysis was conducted using Origin 8.5 software based on the methods described by Garcia-Valls & Hatton<sup>45</sup>. In the present study, the heat is related to the interaction enthalpy ( $\Delta H$ ) by

$$\Delta Q = \Delta H (\Delta n_M) V_{\text{cell}} \quad (1)$$

Where  $\Delta n_M$  (mmol g<sup>-1</sup>) is the changes of the total Cd bound to different components following the given injections.  $V_{\text{cell}}$  denotes the volume of the solution being titrated. The total heat released after a given number,  $t$ , of injection can be obtained by summing all the  $\Delta Q$  value to give

$$Q_b = \sum_{j=1}^t \Delta Q_j = \Delta H [M]_b V_{\text{cell}} \quad (2)$$

where  $[M]_b$  ( $\text{mmol g}^{-1}$ ) represents the total adsorbed Cd after t injection. Since the sorbents may bind more than one Cd ions, the following reaction stoichiometry is used to account for Cd adsorption

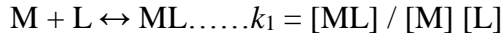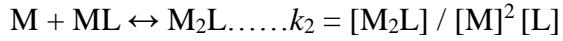

.....

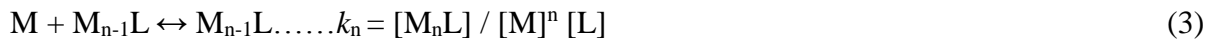

where n denotes the total number of binding sites on different components and the equilibrium constant is conditional at each pH value, then we can write

$$k_i = \frac{[M_iL]}{[M]^i [L]} = K^i \quad (4)$$

where  $K^i$  ( $\text{L mmol}^{-1}$ ) is the global constant ( $\beta_i$ ). Then, after some algebraic manipulation, the average fraction of Cd binding sites occupied can be shown

$$\Phi = \frac{\sum_{i=1}^n i[M_iL]}{\sum_{i=0}^n [M_iL]} = \frac{\sum_{i=1}^n i k_i [M]^i [L]}{\sum_{i=0}^n k_i [M]^i [L]} = \frac{\sum_{i=1}^n i K_i [M]^i}{\sum_{i=0}^n K_i [M]^i} = \frac{nK[M]}{1+K[M]} \quad (5)$$

The total Cd concentration is

$$[M]_T = [M] + [M]_b = [M] + [L]_T \Phi = [M] + [L]_T \frac{nK[M]}{1+K[M]} \quad (6)$$

This equation is a quadratic in  $[M]$ , which can be solved to yield the free concentration of Cd in solution as a function of the total Cd and different components concentrations. The concentration of bound metal ions can then be determined to be

$$[M]_b = [M]_T - [M] = [M]_T + \frac{(1 + nK[L]_T - K[M]_T) - \sqrt{(1 + nK[L]_T - K[M]_T)^2 + 4K[M]_T}}{2K} \quad (7)$$

Therefore, the total heat released or adsorbed when the sorbents have been titrated with Cd solution when the total sorbent and Cd concentration are  $[L]_T$  and  $[M]_T$ , respectively, is

$$Q_b = \Delta H \left( [M]_T + \frac{(1 + nK[L]_T - K[M]_T) - \sqrt{(1 + nK[L]_T - K[M]_T)^2 + 4K[M]_T}}{2K} \right) V_{\text{cell}} \quad (8)$$

The relevant thermodynamic parameters,  $n$ ,  $K$ , and  $\Delta H$  can then be determined as those values giving the best fit of this expression to the cumulative heat release curves. The  $\Delta G$  can be calculated by:  $\Delta G = -RT \ln K$ , where  $T$  is the absolute temperature (301 K),  $R$  is the universal gas constant, and  $K$  represents the equilibrium binding constant.  $\Delta S$  is derived from  $\Delta G = \Delta H - T\Delta S$ .
